# Supplementary material for: A Two‐Stage Stochastic Model for Maintenance and Rehabilitation Planning of Pavements
Source: Hindawi journal article supplement (doi:10.1155/2019/3971791), 2019-01-01
Supplement: f1 [file 3971791.f1.xlsx]

## Sheet: Sheet1
sets
t period /1*3/
t1 comaki /1,2/
n Piece number /1*10/
m Operation /1*8/
s senario /1*8/
b quality /1*10/;
alias(t,tt);
table dropf(n,t)
1 2 3
1 0.08 0.16 0.26
2 0.08 0.16 0.26
3 0.05 0.07 0.1
4 0.1 0.17 0.25
5 0.03 0.06 0.08
6 0.08 0.16 0.26
7 0.05 0.13 0.18
8 0.08 0.13 0.21
9 0.08 0.16 0.26
10 0 0.05 0.13
;
table dropt(n,t)
1 2 3
1 0.06 0.12 0.17
2 0.06 0.12 0.17
3 0.03 0.06 0.09
4 0.05 0.09 0.13
5 0.02 0.05 0.07
6 0.07 0.14 0.21
7 0.04 0.08 0.11
8 0.04 0.08 0.11
9 0.07 0.14 0.2
10 0 0.01 0.05
;
table drops(n,t)
1 2 3
1 0 0 0
2 0.07 0.07 0.15
3 0.07 0.07 0.15
4 0.07 0.14 0.14
5 0.07 0.07 0.14
6 0.07 0.07 0.15
7 0.07 0.07 0.15
8 0.07 0.14 0.14
9 0.07 0.14 0.21
10 0.07 0.07 0.15
;
table dropr(n,t)
1 2 3
1 0.06 0.14 0.19
2 0.05 0.11 0.17
3 0.05 0.11 0.17
4 0.05 0.08 0.13
5 0.03 0.05 0.08
6 0.05 0.11 0.17
7 0.05 0.08 0.13
8 0 0 0
9 0 0 0
10 0.06 0.12 0.2
;
table dropvf(n,m,t,t1,b)
1.2.1.1 1.2.1.2 1.2.1.3 1.2.1.4 1.2.1.5 1.2.1.6 1.2.1.7 1.2.1.8 1.2.1.9 1.2.1.10 1.3.1.1 1.3.1.2 1.3.1.3 1.3.1.4 1.3.1.5 1.3.1.6 1.3.1.7 1.3.1.8 1.3.1.9 1.3.1.10 1.3.2.1 1.3.2.2 1.3.2.3 1.3.2.4 1.3.2.5 1.3.2.6 1.3.2.7 1.3.2.8 1.3.2.9 1.3.2.10 2.2.1.1 2.2.1.2 2.2.1.3 2.2.1.4 2.2.1.5 2.2.1.6 2.2.1.7 2.2.1.8 2.2.1.9 2.2.1.10 2.3.1.1 2.3.1.2 2.3.1.3 2.3.1.4 2.3.1.5 2.3.1.6 2.3.1.7 2.3.1.8 2.3.1.9 2.3…
1 0.02 0.03 0.02 0.03 0.08 0.05 0.07 0.1 0.08 0.05 0 0.02 0.03 0.05 0.05 0.08 0.08 0.07 0.1 0.08 0.02 0.05 0.05 0.08 0.13 0.13 0.15 0.17 0.18 0.13 0.03 0.02 0.05 0.05 0.05 0.06 0.07 0.08 0.11 0.05 0 0.03 0.03 0.03 0.05 0.05 0.08 0.07 0.08 0.08 0.03 0.05 0.08 0.08 0.1 0.11 0.15 0.15 0.19 0.13 0.02 0.03 0.02 0.03 0.08 0.05 0.07 0.1 0.08 0.05 0 0.02 0.03 0.05 0.05 0.08 0.08 0.07 0.1 0.08 0.02 0.05 0…
2 0.02 0.03 0.02 0.03 0.08 0.05 0.07 0.1 0.08 0.05 0 0.02 0.03 0.05 0.05 0.08 0.08 0.07 0.1 0.08 0.02 0.05 0.05 0.08 0.13 0.13 0.15 0.17 0.18 0.13 0.03 0.02 0.05 0.05 0.05 0.06 0.07 0.08 0.11 0.05 0 0.03 0.03 0.03 0.05 0.05 0.08 0.07 0.08 0.08 0.03 0.05 0.08 0.08 0.1 0.11 0.15 0.15 0.19 0.13 0.02 0.03 0.02 0.03 0.08 0.05 0.07 0.1 0.08 0.05 0 0.02 0.03 0.05 0.05 0.08 0.08 0.07 0.1 0.08 0.02 0.05 0…
3 0.02 0.03 0.02 0.03 0.08 0.05 0.07 0.1 0.08 0.05 0 0.02 0.03 0.05 0.05 0.08 0.08 0.07 0.1 0.08 0.02 0.05 0.05 0.08 0.13 0.13 0.15 0.17 0.18 0.13 0.03 0.02 0.05 0.05 0.05 0.06 0.07 0.08 0.11 0.05 0 0.03 0.03 0.03 0.05 0.05 0.08 0.07 0.08 0.08 0.03 0.05 0.08 0.08 0.1 0.11 0.15 0.15 0.19 0.13 0.02 0.03 0.02 0.03 0.08 0.05 0.07 0.1 0.08 0.05 0 0.02 0.03 0.05 0.05 0.08 0.08 0.07 0.1 0.08 0.02 0.05 0…
4 0.02 0.03 0.02 0.03 0.08 0.05 0.07 0.1 0.08 0.05 0 0.02 0.03 0.05 0.05 0.08 0.08 0.07 0.1 0.08 0.02 0.05 0.05 0.08 0.13 0.13 0.15 0.17 0.18 0.13 0.03 0.02 0.05 0.05 0.05 0.06 0.07 0.08 0.11 0.05 0 0.03 0.03 0.03 0.05 0.05 0.08 0.07 0.08 0.08 0.03 0.05 0.08 0.08 0.1 0.11 0.15 0.15 0.19 0.13 0.02 0.03 0.02 0.03 0.08 0.05 0.07 0.1 0.08 0.05 0 0.02 0.03 0.05 0.05 0.08 0.08 0.07 0.1 0.08 0.02 0.05 0…
5 0.02 0.03 0.02 0.03 0.08 0.05 0.07 0.1 0.08 0.05 0 0.02 0.03 0.05 0.05 0.08 0.08 0.07 0.1 0.08 0.02 0.05 0.05 0.08 0.13 0.13 0.15 0.17 0.18 0.13 0.03 0.02 0.05 0.05 0.05 0.06 0.07 0.08 0.11 0.05 0 0.03 0.03 0.03 0.05 0.05 0.08 0.07 0.08 0.08 0.03 0.05 0.08 0.08 0.1 0.11 0.15 0.15 0.19 0.13 0.02 0.03 0.02 0.03 0.08 0.05 0.07 0.1 0.08 0.05 0 0.02 0.03 0.05 0.05 0.08 0.08 0.07 0.1 0.08 0.02 0.05 0…
6 0.02 0.03 0.02 0.03 0.08 0.05 0.07 0.1 0.08 0.05 0 0.02 0.03 0.05 0.05 0.08 0.08 0.07 0.1 0.08 0.02 0.05 0.05 0.08 0.13 0.13 0.15 0.17 0.18 0.13 0.03 0.02 0.05 0.05 0.05 0.06 0.07 0.08 0.11 0.05 0 0.03 0.03 0.03 0.05 0.05 0.08 0.07 0.08 0.08 0.03 0.05 0.08 0.08 0.1 0.11 0.15 0.15 0.19 0.13 0.02 0.03 0.02 0.03 0.08 0.05 0.07 0.1 0.08 0.05 0 0.02 0.03 0.05 0.05 0.08 0.08 0.07 0.1 0.08 0.02 0.05 0…
7 0.02 0.03 0.02 0.03 0.08 0.05 0.07 0.1 0.08 0.05 0 0.02 0.03 0.05 0.05 0.08 0.08 0.07 0.1 0.08 0.02 0.05 0.05 0.08 0.13 0.13 0.15 0.17 0.18 0.13 0.03 0.02 0.05 0.05 0.05 0.06 0.07 0.08 0.11 0.05 0 0.03 0.03 0.03 0.05 0.05 0.08 0.07 0.08 0.08 0.03 0.05 0.08 0.08 0.1 0.11 0.15 0.15 0.19 0.13 0.02 0.03 0.02 0.03 0.08 0.05 0.07 0.1 0.08 0.05 0 0.02 0.03 0.05 0.05 0.08 0.08 0.07 0.1 0.08 0.02 0.05 0…
8 0.02 0.03 0.02 0.03 0.08 0.05 0.07 0.1 0.08 0.05 0 0.02 0.03 0.05 0.05 0.08 0.08 0.07 0.1 0.08 0.02 0.05 0.05 0.08 0.13 0.13 0.15 0.17 0.18 0.13 0.03 0.02 0.05 0.05 0.05 0.06 0.07 0.08 0.11 0.05 0 0.03 0.03 0.03 0.05 0.05 0.08 0.07 0.08 0.08 0.03 0.05 0.08 0.08 0.1 0.11 0.15 0.15 0.19 0.13 0.02 0.03 0.02 0.03 0.08 0.05 0.07 0.1 0.08 0.05 0 0.02 0.03 0.05 0.05 0.08 0.08 0.07 0.1 0.08 0.02 0.05 0…
9 0.02 0.03 0.02 0.03 0.08 0.05 0.07 0.1 0.08 0.05 0 0.02 0.03 0.05 0.05 0.08 0.08 0.07 0.1 0.08 0.02 0.05 0.05 0.08 0.13 0.13 0.15 0.17 0.18 0.13 0.03 0.02 0.05 0.05 0.05 0.06 0.07 0.08 0.11 0.05 0 0.03 0.03 0.03 0.05 0.05 0.08 0.07 0.08 0.08 0.03 0.05 0.08 0.08 0.1 0.11 0.15 0.15 0.19 0.13 0.02 0.03 0.02 0.03 0.08 0.05 0.07 0.1 0.08 0.05 0 0.02 0.03 0.05 0.05 0.08 0.08 0.07 0.1 0.08 0.02 0.05 0…
10 0.02 0.03 0.02 0.03 0.08 0.05 0.07 0.1 0.08 0.05 0 0.02 0.03 0.05 0.05 0.08 0.08 0.07 0.1 0.08 0.02 0.05 0.05 0.08 0.13 0.13 0.15 0.17 0.18 0.13 0.03 0.02 0.05 0.05 0.05 0.06 0.07 0.08 0.11 0.05 0 0.03 0.03 0.03 0.05 0.05 0.08 0.07 0.08 0.08 0.03 0.05 0.08 0.08 0.1 0.11 0.15 0.15 0.19 0.13 0.02 0.03 0.02 0.03 0.08 0.05 0.07 0.1 0.08 0.05 0 0.02 0.03 0.05 0.05 0.08 0.08 0.07 0.1 0.08 0.02 0.05 …
;
table dropvt(n,m,t,t1,b)
1.2.1.1 1.2.1.2 1.2.1.3 1.2.1.4 1.2.1.5 1.2.1.6 1.2.1.7 1.2.1.8 1.2.1.9 1.2.1.10 1.3.1.1 1.3.1.2 1.3.1.3 1.3.1.4 1.3.1.5 1.3.1.6 1.3.1.7 1.3.1.8 1.3.1.9 1.3.1.10 1.3.2.1 1.3.2.2 1.3.2.3 1.3.2.4 1.3.2.5 1.3.2.6 1.3.2.7 1.3.2.8 1.3.2.9 1.3.2.10 2.2.1.1 2.2.1.2 2.2.1.3 2.2.1.4 2.2.1.5 2.2.1.6 2.2.1.7 2.2.1.8 2.2.1.9 2.2.1.10 2.3.1.1 2.3.1.2 2.3.1.3 2.3.1.4 2.3.1.5 2.3.1.6 2.3.1.7 2.3.1.8 2.3.1.9 2.3…
1 0.03 0.03 0.04 0.04 0.05 0.06 0.07 0.07 0.07 0.01 0.02 0.03 0.03 0.04 0.05 0.05 0.06 0.07 0.07 0.04 0.05 0.06 0.07 0.08 0.1 0.11 0.13 0.14 0.14 0.05 0 0.04 0.04 0.04 0.04 0.08 0.04 0.08 0.08 0 0.04 0 0.04 0.04 0.04 0.04 0.08 0.08 0.08 0.08 0.04 0.04 0.08 0.08 0.08 0.12 0.12 0.16 0.16 0.08 0 0 0.04 0.04 0.04 0.08 0.04 0.04 0.08 0.04 0.04 0.05 0.04 0.04 0.04 0.04 0.08 0.09 0.04 0.04 0.04 0.05 0.0…
2 0.03 0.03 0.04 0.04 0.05 0.06 0.07 0.07 0.07 0.01 0.02 0.03 0.03 0.04 0.05 0.05 0.06 0.07 0.07 0.04 0.05 0.06 0.07 0.08 0.1 0.11 0.13 0.14 0.14 0.05 0 0.04 0.04 0.04 0.04 0.08 0.04 0.08 0.08 0 0.04 0 0.04 0.04 0.04 0.04 0.08 0.08 0.08 0.08 0.04 0.04 0.08 0.08 0.08 0.12 0.12 0.16 0.16 0.08 0 0 0.04 0.04 0.04 0.08 0.04 0.04 0.08 0.04 0.04 0.05 0.04 0.04 0.04 0.04 0.08 0.09 0.04 0.04 0.04 0.05 0.0…
3 0.03 0.03 0.04 0.04 0.05 0.06 0.07 0.07 0.07 0.01 0.02 0.03 0.03 0.04 0.05 0.05 0.06 0.07 0.07 0.04 0.05 0.06 0.07 0.08 0.1 0.11 0.13 0.14 0.14 0.05 0 0.04 0.04 0.04 0.04 0.08 0.04 0.08 0.08 0 0.04 0 0.04 0.04 0.04 0.04 0.08 0.08 0.08 0.08 0.04 0.04 0.08 0.08 0.08 0.12 0.12 0.16 0.16 0.08 0 0 0.04 0.04 0.04 0.08 0.04 0.04 0.08 0.04 0.04 0.05 0.04 0.04 0.04 0.04 0.08 0.09 0.04 0.04 0.04 0.05 0.0…
4 0.03 0.03 0.04 0.04 0.05 0.06 0.07 0.07 0.07 0.01 0.02 0.03 0.03 0.04 0.05 0.05 0.06 0.07 0.07 0.04 0.05 0.06 0.07 0.08 0.1 0.11 0.13 0.14 0.14 0.05 0 0.04 0.04 0.04 0.04 0.08 0.04 0.08 0.08 0 0.04 0 0.04 0.04 0.04 0.04 0.08 0.08 0.08 0.08 0.04 0.04 0.08 0.08 0.08 0.12 0.12 0.16 0.16 0.08 0 0 0.04 0.04 0.04 0.08 0.04 0.04 0.08 0.04 0.04 0.05 0.04 0.04 0.04 0.04 0.08 0.09 0.04 0.04 0.04 0.05 0.0…
5 0.03 0.03 0.04 0.04 0.05 0.06 0.07 0.07 0.07 0.01 0.02 0.03 0.03 0.04 0.05 0.05 0.06 0.07 0.07 0.04 0.05 0.06 0.07 0.08 0.1 0.11 0.13 0.14 0.14 0.05 0 0.04 0.04 0.04 0.04 0.08 0.04 0.08 0.08 0 0.04 0 0.04 0.04 0.04 0.04 0.08 0.08 0.08 0.08 0.04 0.04 0.08 0.08 0.08 0.12 0.12 0.16 0.16 0.08 0 0 0.04 0.04 0.04 0.08 0.04 0.04 0.08 0.04 0.04 0.05 0.04 0.04 0.04 0.04 0.08 0.09 0.04 0.04 0.04 0.05 0.0…
6 0.03 0.03 0.04 0.04 0.05 0.06 0.07 0.07 0.07 0.01 0.02 0.03 0.03 0.04 0.05 0.05 0.06 0.07 0.07 0.04 0.05 0.06 0.07 0.08 0.1 0.11 0.13 0.14 0.14 0.05 0 0.04 0.04 0.04 0.04 0.08 0.04 0.08 0.08 0 0.04 0 0.04 0.04 0.04 0.04 0.08 0.08 0.08 0.08 0.04 0.04 0.08 0.08 0.08 0.12 0.12 0.16 0.16 0.08 0 0 0.04 0.04 0.04 0.08 0.04 0.04 0.08 0.04 0.04 0.05 0.04 0.04 0.04 0.04 0.08 0.09 0.04 0.04 0.04 0.05 0.0…
7 0.03 0.03 0.04 0.04 0.05 0.06 0.07 0.07 0.07 0.01 0.02 0.03 0.03 0.04 0.05 0.05 0.06 0.07 0.07 0.04 0.05 0.06 0.07 0.08 0.1 0.11 0.13 0.14 0.14 0.05 0 0.04 0.04 0.04 0.04 0.08 0.04 0.08 0.08 0 0.04 0 0.04 0.04 0.04 0.04 0.08 0.08 0.08 0.08 0.04 0.04 0.08 0.08 0.08 0.12 0.12 0.16 0.16 0.08 0 0 0.04 0.04 0.04 0.08 0.04 0.04 0.08 0.04 0.04 0.05 0.04 0.04 0.04 0.04 0.08 0.09 0.04 0.04 0.04 0.05 0.0…
8 0.03 0.03 0.04 0.04 0.05 0.06 0.07 0.07 0.07 0.01 0.02 0.03 0.03 0.04 0.05 0.05 0.06 0.07 0.07 0.04 0.05 0.06 0.07 0.08 0.1 0.11 0.13 0.14 0.14 0.05 0 0.04 0.04 0.04 0.04 0.08 0.04 0.08 0.08 0 0.04 0 0.04 0.04 0.04 0.04 0.08 0.08 0.08 0.08 0.04 0.04 0.08 0.08 0.08 0.12 0.12 0.16 0.16 0.08 0 0 0.04 0.04 0.04 0.08 0.04 0.04 0.08 0.04 0.04 0.05 0.04 0.04 0.04 0.04 0.08 0.09 0.04 0.04 0.04 0.05 0.0…
9 0.03 0.03 0.04 0.04 0.05 0.06 0.07 0.07 0.07 0.01 0.02 0.03 0.03 0.04 0.05 0.05 0.06 0.07 0.07 0.04 0.05 0.06 0.07 0.08 0.1 0.11 0.13 0.14 0.14 0.05 0 0.04 0.04 0.04 0.04 0.08 0.04 0.08 0.08 0 0.04 0 0.04 0.04 0.04 0.04 0.08 0.08 0.08 0.08 0.04 0.04 0.08 0.08 0.08 0.12 0.12 0.16 0.16 0.08 0 0 0.04 0.04 0.04 0.08 0.04 0.04 0.08 0.04 0.04 0.05 0.04 0.04 0.04 0.04 0.08 0.09 0.04 0.04 0.04 0.05 0.0…
10 0.03 0.03 0.04 0.04 0.05 0.06 0.07 0.07 0.07 0.01 0.02 0.03 0.03 0.04 0.05 0.05 0.06 0.07 0.07 0.04 0.05 0.06 0.07 0.08 0.1 0.11 0.13 0.14 0.14 0.05 0 0.04 0.04 0.04 0.04 0.08 0.04 0.08 0.08 0 0.04 0 0.04 0.04 0.04 0.04 0.08 0.08 0.08 0.08 0.04 0.04 0.08 0.08 0.08 0.12 0.12 0.16 0.16 0.08 0 0 0.04 0.04 0.04 0.08 0.04 0.04 0.08 0.04 0.04 0.05 0.04 0.04 0.04 0.04 0.08 0.09 0.04 0.04 0.04 0.05 0.…
;
table dropvs(n,m,t,t1,b)
1.2.1.1 1.2.1.2 1.2.1.3 1.2.1.4 1.2.1.5 1.2.1.6 1.2.1.7 1.2.1.8 1.2.1.9 1.2.1.10 1.3.1.1 1.3.1.2 1.3.1.3 1.3.1.4 1.3.1.5 1.3.1.6 1.3.1.7 1.3.1.8 1.3.1.9 1.3.1.10 1.3.2.1 1.3.2.2 1.3.2.3 1.3.2.4 1.3.2.5 1.3.2.6 1.3.2.7 1.3.2.8 1.3.2.9 1.3.2.10 2.2.1.1 2.2.1.2 2.2.1.3 2.2.1.4 2.2.1.5 2.2.1.6 2.2.1.7 2.2.1.8 2.2.1.9 2.2.1.10 2.3.1.1 2.3.1.2 2.3.1.3 2.3.1.4 2.3.1.5 2.3.1.6 2.3.1.7 2.3.1.8 2.3.1.9 2.3…
1 0 0 0 0.07 0.07 0.07 0.07 0 0.07 0 0.07 0.07 0.08 0 0 0.07 0.07 0.08 0 0 0.07 0.07 0.08 0.07 0.07 0.14 0.14 0.08 0.07 0 0 0 0 0.07 0.07 0.07 0 0.08 0.07 0 0.07 0.07 0.08 0 0 0.07 0.07 0.07 0.08 0 0.07 0.07 0.08 0.07 0.07 0.14 0.07 0.15 0.15 0 0 0 0 0.07 0.07 0.07 0.07 0 0.07 0 0.07 0.07 0.08 0 0 0.07 0.07 0.08 0 0 0.07 0.07 0.08 0.07 0.07 0.14 0.14 0.08 0.07 0 0 0 0 0 0.07 0 0.07 0.08 0 0 0 0.0…
2 0 0 0 0.07 0.07 0.07 0.07 0 0.07 0 0.07 0.07 0.08 0 0 0.07 0.07 0.08 0 0 0.07 0.07 0.08 0.07 0.07 0.14 0.14 0.08 0.07 0 0 0 0 0.07 0.07 0.07 0 0.08 0.07 0 0.07 0.07 0.08 0 0 0.07 0.07 0.07 0.08 0 0.07 0.07 0.08 0.07 0.07 0.14 0.07 0.15 0.15 0 0 0 0 0.07 0.07 0.07 0.07 0 0.07 0 0.07 0.07 0.08 0 0 0.07 0.07 0.08 0 0 0.07 0.07 0.08 0.07 0.07 0.14 0.14 0.08 0.07 0 0 0 0 0 0.07 0 0.07 0.08 0 0 0 0.0…
3 0 0 0 0.07 0.07 0.07 0.07 0 0.07 0 0.07 0.07 0.08 0 0 0.07 0.07 0.08 0 0 0.07 0.07 0.08 0.07 0.07 0.14 0.14 0.08 0.07 0 0 0 0 0.07 0.07 0.07 0 0.08 0.07 0 0.07 0.07 0.08 0 0 0.07 0.07 0.07 0.08 0 0.07 0.07 0.08 0.07 0.07 0.14 0.07 0.15 0.15 0 0 0 0 0.07 0.07 0.07 0.07 0 0.07 0 0.07 0.07 0.08 0 0 0.07 0.07 0.08 0 0 0.07 0.07 0.08 0.07 0.07 0.14 0.14 0.08 0.07 0 0 0 0 0 0.07 0 0.07 0.08 0 0 0 0.0…
4 0 0 0 0.07 0.07 0.07 0.07 0 0.07 0 0.07 0.07 0.08 0 0 0.07 0.07 0.08 0 0 0.07 0.07 0.08 0.07 0.07 0.14 0.14 0.08 0.07 0 0 0 0 0.07 0.07 0.07 0 0.08 0.07 0 0.07 0.07 0.08 0 0 0.07 0.07 0.07 0.08 0 0.07 0.07 0.08 0.07 0.07 0.14 0.07 0.15 0.15 0 0 0 0 0.07 0.07 0.07 0.07 0 0.07 0 0.07 0.07 0.08 0 0 0.07 0.07 0.08 0 0 0.07 0.07 0.08 0.07 0.07 0.14 0.14 0.08 0.07 0 0 0 0 0 0.07 0 0.07 0.08 0 0 0 0.0…
5 0 0 0 0.07 0.07 0.07 0.07 0 0.07 0 0.07 0.07 0.08 0 0 0.07 0.07 0.08 0 0 0.07 0.07 0.08 0.07 0.07 0.14 0.14 0.08 0.07 0 0 0 0 0.07 0.07 0.07 0 0.08 0.07 0 0.07 0.07 0.08 0 0 0.07 0.07 0.07 0.08 0 0.07 0.07 0.08 0.07 0.07 0.14 0.07 0.15 0.15 0 0 0 0 0.07 0.07 0.07 0.07 0 0.07 0 0.07 0.07 0.08 0 0 0.07 0.07 0.08 0 0 0.07 0.07 0.08 0.07 0.07 0.14 0.14 0.08 0.07 0 0 0 0 0 0.07 0 0.07 0.08 0 0 0 0.0…
6 0 0 0 0.07 0.07 0.07 0.07 0 0.07 0 0.07 0.07 0.08 0 0 0.07 0.07 0.08 0 0 0.07 0.07 0.08 0.07 0.07 0.14 0.14 0.08 0.07 0 0 0 0 0.07 0.07 0.07 0 0.08 0.07 0 0.07 0.07 0.08 0 0 0.07 0.07 0.07 0.08 0 0.07 0.07 0.08 0.07 0.07 0.14 0.07 0.15 0.15 0 0 0 0 0.07 0.07 0.07 0.07 0 0.07 0 0.07 0.07 0.08 0 0 0.07 0.07 0.08 0 0 0.07 0.07 0.08 0.07 0.07 0.14 0.14 0.08 0.07 0 0 0 0 0 0.07 0 0.07 0.08 0 0 0 0.0…
7 0 0 0 0.07 0.07 0.07 0.07 0 0.07 0 0.07 0.07 0.08 0 0 0.07 0.07 0.08 0 0 0.07 0.07 0.08 0.07 0.07 0.14 0.14 0.08 0.07 0 0 0 0 0.07 0.07 0.07 0 0.08 0.07 0 0.07 0.07 0.08 0 0 0.07 0.07 0.07 0.08 0 0.07 0.07 0.08 0.07 0.07 0.14 0.07 0.15 0.15 0 0 0 0 0.07 0.07 0.07 0.07 0 0.07 0 0.07 0.07 0.08 0 0 0.07 0.07 0.08 0 0 0.07 0.07 0.08 0.07 0.07 0.14 0.14 0.08 0.07 0 0 0 0 0 0.07 0 0.07 0.08 0 0 0 0.0…
8 0 0 0 0.07 0.07 0.07 0.07 0 0.07 0 0.07 0.07 0.08 0 0 0.07 0.07 0.08 0 0 0.07 0.07 0.08 0.07 0.07 0.14 0.14 0.08 0.07 0 0 0 0 0.07 0.07 0.07 0 0.08 0.07 0 0.07 0.07 0.08 0 0 0.07 0.07 0.07 0.08 0 0.07 0.07 0.08 0.07 0.07 0.14 0.07 0.15 0.15 0 0 0 0 0.07 0.07 0.07 0.07 0 0.07 0 0.07 0.07 0.08 0 0 0.07 0.07 0.08 0 0 0.07 0.07 0.08 0.07 0.07 0.14 0.14 0.08 0.07 0 0 0 0 0 0.07 0 0.07 0.08 0 0 0 0.0…
9 0 0 0 0.07 0.07 0.07 0.07 0 0.07 0 0.07 0.07 0.08 0 0 0.07 0.07 0.08 0 0 0.07 0.07 0.08 0.07 0.07 0.14 0.14 0.08 0.07 0 0 0 0 0.07 0.07 0.07 0 0.08 0.07 0 0.07 0.07 0.08 0 0 0.07 0.07 0.07 0.08 0 0.07 0.07 0.08 0.07 0.07 0.14 0.07 0.15 0.15 0 0 0 0 0.07 0.07 0.07 0.07 0 0.07 0 0.07 0.07 0.08 0 0 0.07 0.07 0.08 0 0 0.07 0.07 0.08 0.07 0.07 0.14 0.14 0.08 0.07 0 0 0 0 0 0.07 0 0.07 0.08 0 0 0 0.0…
10 0 0 0 0.07 0.07 0.07 0.07 0 0.07 0 0.07 0.07 0.08 0 0 0.07 0.07 0.08 0 0 0.07 0.07 0.08 0.07 0.07 0.14 0.14 0.08 0.07 0 0 0 0 0.07 0.07 0.07 0 0.08 0.07 0 0.07 0.07 0.08 0 0 0.07 0.07 0.07 0.08 0 0.07 0.07 0.08 0.07 0.07 0.14 0.07 0.15 0.15 0 0 0 0 0.07 0.07 0.07 0.07 0 0.07 0 0.07 0.07 0.08 0 0 0.07 0.07 0.08 0 0 0.07 0.07 0.08 0.07 0.07 0.14 0.14 0.08 0.07 0 0 0 0 0 0.07 0 0.07 0.08 0 0 0 0.…
;
table dropvr(n,m,t,t1,b)
1.2.1.1 1.2.1.2 1.2.1.3 1.2.1.4 1.2.1.5 1.2.1.6 1.2.1.7 1.2.1.8 1.2.1.9 1.2.1.10 1.3.1.1 1.3.1.2 1.3.1.3 1.3.1.4 1.3.1.5 1.3.1.6 1.3.1.7 1.3.1.8 1.3.1.9 1.3.1.10 1.3.2.1 1.3.2.2 1.3.2.3 1.3.2.4 1.3.2.5 1.3.2.6 1.3.2.7 1.3.2.8 1.3.2.9 1.3.2.10 2.2.1.1 2.2.1.2 2.2.1.3 2.2.1.4 2.2.1.5 2.2.1.6 2.2.1.7 2.2.1.8 2.2.1.9 2.2.1.10 2.3.1.1 2.3.1.2 2.3.1.3 2.3.1.4 2.3.1.5 2.3.1.6 2.3.1.7 2.3.1.8 2.3.1.9 2.3…
1 0.02 0.05 0.06 0.03 0.06 0.06 0.08 0.06 0.05 0 0.03 0.03 0.03 0.05 0.05 0.06 0.05 0.08 0.06 0 0.05 0.08 0.09 0.08 0.11 0.12 0.13 0.14 0.11 0 0.03 0.03 0.03 0.03 0.06 0.06 0.06 0.09 0.06 0 0.03 0.03 0.06 0.05 0.06 0.05 0.06 0.05 0.09 0 0.06 0.06 0.09 0.08 0.12 0.11 0.12 0.14 0.15 0 0.02 0.05 0.06 0.03 0.06 0.06 0.08 0.06 0.05 0 0.03 0.03 0.03 0.05 0.05 0.06 0.05 0.08 0.06 0 0.05 0.08 0.09 0.08 0…
2 0.02 0.05 0.06 0.03 0.06 0.06 0.08 0.06 0.05 0 0.03 0.03 0.03 0.05 0.05 0.06 0.05 0.08 0.06 0 0.05 0.08 0.09 0.08 0.11 0.12 0.13 0.14 0.11 0 0.03 0.03 0.03 0.03 0.06 0.06 0.06 0.09 0.06 0 0.03 0.03 0.06 0.05 0.06 0.05 0.06 0.05 0.09 0 0.06 0.06 0.09 0.08 0.12 0.11 0.12 0.14 0.15 0 0.02 0.05 0.06 0.03 0.06 0.06 0.08 0.06 0.05 0 0.03 0.03 0.03 0.05 0.05 0.06 0.05 0.08 0.06 0 0.05 0.08 0.09 0.08 0…
3 0.02 0.05 0.06 0.03 0.06 0.06 0.08 0.06 0.05 0 0.03 0.03 0.03 0.05 0.05 0.06 0.05 0.08 0.06 0 0.05 0.08 0.09 0.08 0.11 0.12 0.13 0.14 0.11 0 0.03 0.03 0.03 0.03 0.06 0.06 0.06 0.09 0.06 0 0.03 0.03 0.06 0.05 0.06 0.05 0.06 0.05 0.09 0 0.06 0.06 0.09 0.08 0.12 0.11 0.12 0.14 0.15 0 0.02 0.05 0.06 0.03 0.06 0.06 0.08 0.06 0.05 0 0.03 0.03 0.03 0.05 0.05 0.06 0.05 0.08 0.06 0 0.05 0.08 0.09 0.08 0…
4 0.02 0.05 0.06 0.03 0.06 0.06 0.08 0.06 0.05 0 0.03 0.03 0.03 0.05 0.05 0.06 0.05 0.08 0.06 0 0.05 0.08 0.09 0.08 0.11 0.12 0.13 0.14 0.11 0 0.03 0.03 0.03 0.03 0.06 0.06 0.06 0.09 0.06 0 0.03 0.03 0.06 0.05 0.06 0.05 0.06 0.05 0.09 0 0.06 0.06 0.09 0.08 0.12 0.11 0.12 0.14 0.15 0 0.02 0.05 0.06 0.03 0.06 0.06 0.08 0.06 0.05 0 0.03 0.03 0.03 0.05 0.05 0.06 0.05 0.08 0.06 0 0.05 0.08 0.09 0.08 0…
5 0.02 0.05 0.06 0.03 0.06 0.06 0.08 0.06 0.05 0 0.03 0.03 0.03 0.05 0.05 0.06 0.05 0.08 0.06 0 0.05 0.08 0.09 0.08 0.11 0.12 0.13 0.14 0.11 0 0.03 0.03 0.03 0.03 0.06 0.06 0.06 0.09 0.06 0 0.03 0.03 0.06 0.05 0.06 0.05 0.06 0.05 0.09 0 0.06 0.06 0.09 0.08 0.12 0.11 0.12 0.14 0.15 0 0.02 0.05 0.06 0.03 0.06 0.06 0.08 0.06 0.05 0 0.03 0.03 0.03 0.05 0.05 0.06 0.05 0.08 0.06 0 0.05 0.08 0.09 0.08 0…
6 0.02 0.05 0.06 0.03 0.06 0.06 0.08 0.06 0.05 0 0.03 0.03 0.03 0.05 0.05 0.06 0.05 0.08 0.06 0 0.05 0.08 0.09 0.08 0.11 0.12 0.13 0.14 0.11 0 0.03 0.03 0.03 0.03 0.06 0.06 0.06 0.09 0.06 0 0.03 0.03 0.06 0.05 0.06 0.05 0.06 0.05 0.09 0 0.06 0.06 0.09 0.08 0.12 0.11 0.12 0.14 0.15 0 0.02 0.05 0.06 0.03 0.06 0.06 0.08 0.06 0.05 0 0.03 0.03 0.03 0.05 0.05 0.06 0.05 0.08 0.06 0 0.05 0.08 0.09 0.08 0…
7 0.02 0.05 0.06 0.03 0.06 0.06 0.08 0.06 0.05 0 0.03 0.03 0.03 0.05 0.05 0.06 0.05 0.08 0.06 0 0.05 0.08 0.09 0.08 0.11 0.12 0.13 0.14 0.11 0 0.03 0.03 0.03 0.03 0.06 0.06 0.06 0.09 0.06 0 0.03 0.03 0.06 0.05 0.06 0.05 0.06 0.05 0.09 0 0.06 0.06 0.09 0.08 0.12 0.11 0.12 0.14 0.15 0 0.02 0.05 0.06 0.03 0.06 0.06 0.08 0.06 0.05 0 0.03 0.03 0.03 0.05 0.05 0.06 0.05 0.08 0.06 0 0.05 0.08 0.09 0.08 0…
8 0.02 0.05 0.06 0.03 0.06 0.06 0.08 0.06 0.05 0 0.03 0.03 0.03 0.05 0.05 0.06 0.05 0.08 0.06 0 0.05 0.08 0.09 0.08 0.11 0.12 0.13 0.14 0.11 0 0.03 0.03 0.03 0.03 0.06 0.06 0.06 0.09 0.06 0 0.03 0.03 0.06 0.05 0.06 0.05 0.06 0.05 0.09 0 0.06 0.06 0.09 0.08 0.12 0.11 0.12 0.14 0.15 0 0.02 0.05 0.06 0.03 0.06 0.06 0.08 0.06 0.05 0 0.03 0.03 0.03 0.05 0.05 0.06 0.05 0.08 0.06 0 0.05 0.08 0.09 0.08 0…
9 0.02 0.05 0.06 0.03 0.06 0.06 0.08 0.06 0.05 0 0.03 0.03 0.03 0.05 0.05 0.06 0.05 0.08 0.06 0 0.05 0.08 0.09 0.08 0.11 0.12 0.13 0.14 0.11 0 0.03 0.03 0.03 0.03 0.06 0.06 0.06 0.09 0.06 0 0.03 0.03 0.06 0.05 0.06 0.05 0.06 0.05 0.09 0 0.06 0.06 0.09 0.08 0.12 0.11 0.12 0.14 0.15 0 0.02 0.05 0.06 0.03 0.06 0.06 0.08 0.06 0.05 0 0.03 0.03 0.03 0.05 0.05 0.06 0.05 0.08 0.06 0 0.05 0.08 0.09 0.08 0…
10 0.02 0.05 0.06 0.03 0.06 0.06 0.08 0.06 0.05 0 0.03 0.03 0.03 0.05 0.05 0.06 0.05 0.08 0.06 0 0.05 0.08 0.09 0.08 0.11 0.12 0.13 0.14 0.11 0 0.03 0.03 0.03 0.03 0.06 0.06 0.06 0.09 0.06 0 0.03 0.03 0.06 0.05 0.06 0.05 0.06 0.05 0.09 0 0.06 0.06 0.09 0.08 0.12 0.11 0.12 0.14 0.15 0 0.02 0.05 0.06 0.03 0.06 0.06 0.08 0.06 0.05 0 0.03 0.03 0.03 0.05 0.05 0.06 0.05 0.08 0.06 0 0.05 0.08 0.09 0.08 …
;
table va(n,t)
1 2 3
1 2076 2431 2839
2 1957 2292 2676
3 867 1015 1185
4 1634 1913 2234
5 210 246 287
6 3208 3757 4387
7 1169 1369 1599
8 252 295 344
9 789 924 1080
10 1556 1822 2127
;
parameter inqf(n),inqt(n),inqs(n),inqr(n),imf(m),imt(m),ims(m),imr(m),crlf(n),crlt(n),crls(n),crlr(n),
crhf(n),crht(n),crhs(n),crhr(n),crlo(n),crho(n),prs(s),crq(n),bb(b),mo(m),to(t),
inqf(n) /1 0.87,2 0.81,3 0.27,4 0.62,5 0.11,6 0.88,7 0.46,8 0.52,9 0.88,10 0.98/
inqt(n) /1 0.58,2 0.53,3 0.14,4 0.38,5 0.02,6 0.78,7 0.23,8 0.26,9 0.63,10 1/
inqs(n) /1 1,2 0.71,3 0.3,4 0.9,5 0.14,6 0.74,7 0.24,8 0.48,9 0.6,10 0.76/
inqr(n) /1 0.62,2 0.57,3 0.52,4 0.4,5 0,6 0.59,7 0.34,8 0.3,9 1,10 0.78/
imf(m) /1 0,2 0.1,3 0,4 0,5 0.1,6 0.4,7 0.6,8 1/
imt(m) /1 0.1,2 0.1,3 0.3,4 0.3,5 0.3,6 0.6,7 0.8,8 1/
ims(m) /1 0,2 0.1,3 0.1,4 0.3,5 0.3,6 0.6,7 0.8,8 1/
imr(m) /1 0.1,2 0.1,3 0.1,4 0.1,5 0.3,6 0.6,7 0.8,8 1/
crlf(n) /1 0.6,2 0.6,3 0.6,4 0.6,5 0.45,6 0.6,7 0.55,8 0.6,9 0.55,10 0.6/
crlt(n) /1 0.6,2 0.6,3 0.6,4 0.6,5 0.45,6 0.6,7 0.55,8 0.6,9 0.55,10 0.6/
crls(n) /1 0.6,2 0.6,3 0.6,4 0.6,5 0.45,6 0.6,7 0.55,8 0.6,9 0.55,10 0.6/
crlr(n) /1 0.6,2 0.6,3 0.6,4 0.6,5 0.45,6 0.6,7 0.55,8 0.6,9 0.55,10 0.6/
crhf(n) /1 0.95,2 0.95,3 0.95,4 0.95,5 0.8,6 0.95,7 0.9,8 0.95,9 0.9,10 0.95/
crht(n) /1 0.95,2 0.95,3 0.95,4 0.95,5 0.8,6 0.95,7 0.9,8 0.95,9 0.9,10 0.95/
crhs(n) /1 0.95,2 0.95,3 0.95,4 0.95,5 0.8,6 0.95,7 0.9,8 0.95,9 0.9,10 0.95/
crhr(n) /1 0.95,2 0.95,3 0.95,4 0.95,5 0.8,6 0.95,7 0.9,8 0.95,9 0.9,10 0.95/
crlo(n) /1 0.6,2 0.6,3 0.6,4 0.6,5 0.45,6 0.6,7 0.55,8 0.6,9 0.55,10 0.6/
crho(n) /1 0.95,2 0.95,3 0.95,4 0.95,5 0.8,6 0.95,7 0.9,8 0.95,9 0.9,10 0.95/
prs(s) /1 0.504,2 0.216,3 0.126,4 0.054,5 0.056,6 0.024,7 0.014,8 0.006/
crq(n) /1 0.6,2 0.6,3 0.6,4 0.6,5 0.5,6 0.6,7 0.55,8 0.6,9 0.55,10 0.6/
bb(b) /1 1,2 2,3 3,4 4,5 5,6 6,7 7,8 8,9 9,10 10/
mo(m) /1 1,2 2,3 3,4 4,5 5,6 6,7 7,8 8/
to(t) /1 10,2 20,3 30/
;
table bu(t,s)
1 2 3 4 5 6 7 8
1 2518 2518 2518 2518 1763 1763 1763 1763
2 2946 2946 2062 2062 2946 2946 2062 2062
3 3450 2415 3450 2415 3450 2415 3450 2415
;
table co(n,m,t)
1.1 2.1 3.1 4.1 5.1 6.1 7.1 8.1 1.2 2.2 3.2 4.2 5.2 6.2 7.2 8.2 1.3 2.3 3.3 4.3 5.3 6.3 7.3 8.3
1 692 1107 207 277 346 692 1384 2076 811 1297 243 324 405 811 1621 2431 946 1514 284 379 473 946 1893 2839
2 653 1044 196 261 326 653 1305 1957 764 1222 229 305 382 764 1528 2292 892 1427 268 357 446 892 1784 2676
3 289 462 87 116 144 289 578 867 339 541 101 135 169 339 677 1015 395 632 119 158 198 395 790 1185
4 545 872 163 218 272 545 1089 1634 638 1020 191 255 319 638 1275 1913 745 1192 223 298 372 745 1490 2234
5 210 336 63 84 105 210 420 631 246 394 74 98 123 246 492 738 287 460 86 115 144 287 575 862
6 1070 1711 321 427 534 1070 2138 3208 1253 2004 375 501 626 1253 2504 3757 1462 2340 439 585 731 1462 2924 4387
7 585 935 175 234 292 585 1169 1754 685 1095 205 274 342 685 1369 2054 799 1279 240 320 400 799 1599 2398
8 84 134 25 34 42 84 168 252 98 157 29 39 49 98 196 295 115 183 34 46 57 115 229 344
9 395 632 118 158 197 395 789 1184 462 740 139 185 231 462 924 1387 540 864 162 216 270 540 1080 1619
10 519 830 155 207 259 519 1037 1556 608 972 182 243 303 608 1214 1822 709 1135 213 284 355 709 1418 2127
;
table cub(n,t)
1 2 3
1 42403 49612 58093
2 14255 17346 21124
3 9990 17063 20778
4 104125 121827 142652
5 2812 3290 3853
6 203226 239183 280068
7 22385 26190 30667
8 14569 17046 19959
9 44495 52059 60958
10 15766 19184 23362
;
table cuc(n,t)
1 2 3
1 33850 39604 46374
2 12194 14838 18070
3 8546 13621 16587
4 92094 107750 126169
5 2210 2585 3027
6 179745 211547 247708
7 17355 20305 23776
8 12886 15076 17653
9 38890 45502 53280
10 13487 16411 19984
;
table cug(n,t)
1 2 3
1 32940 38540 45128
2 11851 14420 17561
3 8305 13255 16141
4 90376 105739 123815
5 2109 2468 2890
6 176390 207599 243086
7 16852 19716 23087
8 12645 14795 17324
9 37956 44409 52000
10 13107 15948 19421
;
table ce(n,m,t)
1.1 2.1 3.1 4.1 5.1 6.1 7.1 8.1 1.2 2.2 3.2 4.2 5.2 6.2 7.2 8.2 1.3 2.3 3.3 4.3 5.3 6.3 7.3 8.3
1 20 32 45 67 135 363 738 999 28 43 62 92 185 497 1011 1369 45 70 98 148 295 796 1617 2191
2 0 0 0 0 0 31 84 142 0 0 0 0 0 57 144 232 0 0 0 0 0 115 278 434
3 7 10 15 22 45 137 279 379 10 16 23 34 68 196 400 544 18 28 40 59 119 330 672 912
4 33 50 70 104 209 496 1005 1358 45 68 95 143 286 680 1377 1861 71 109 152 229 457 1087 2204 2978
5 5 8 11 17 34 52 110 153 7 11 16 24 47 71 151 209 11 18 25 38 75 113 241 335
6 36 56 80 120 240 560 1150 1572 51 78 111 167 334 775 1589 2172 81 126 178 267 534 1240 2543 3476
7 16 25 36 54 109 279 568 772 22 35 50 74 149 382 778 1057 36 56 79 119 238 611 1245 1691
8 5 8 11 17 33 61 122 165 7 11 15 23 46 83 168 226 12 18 24 37 73 133 268 362
9 27 41 56 84 168 297 600 808 37 56 77 115 230 407 822 1107 59 90 122 184 367 651 1315 1771
10 0 0 1 2 4 98 209 296 0 1 5 7 14 147 312 440 2 5 12 18 36 256 542 762
;
scalar mm,epsilon,ca,kf,kt,ks,kr,c;
mm=100;
epsilon=0.001;
ca=891.4;
kf=0.2;
kt=0.2;
ks=0.2;
kr=0.2;
c=0.2;
